# Supplementary figures and images for: Extracellular vesicles derived from macrophages display glycyl‐tRNA synthetase 1 and exhibit anti‐cancer activity
Source: PubMed Central journal article supplement — J Extracell Vesicles. 2020 Dec 1;10(1):e12029. doi: 10.1002/jev2.12029 (PMC7890555; doi:10.1002/jev2.12029), 2020-12-01

**Figure S1**

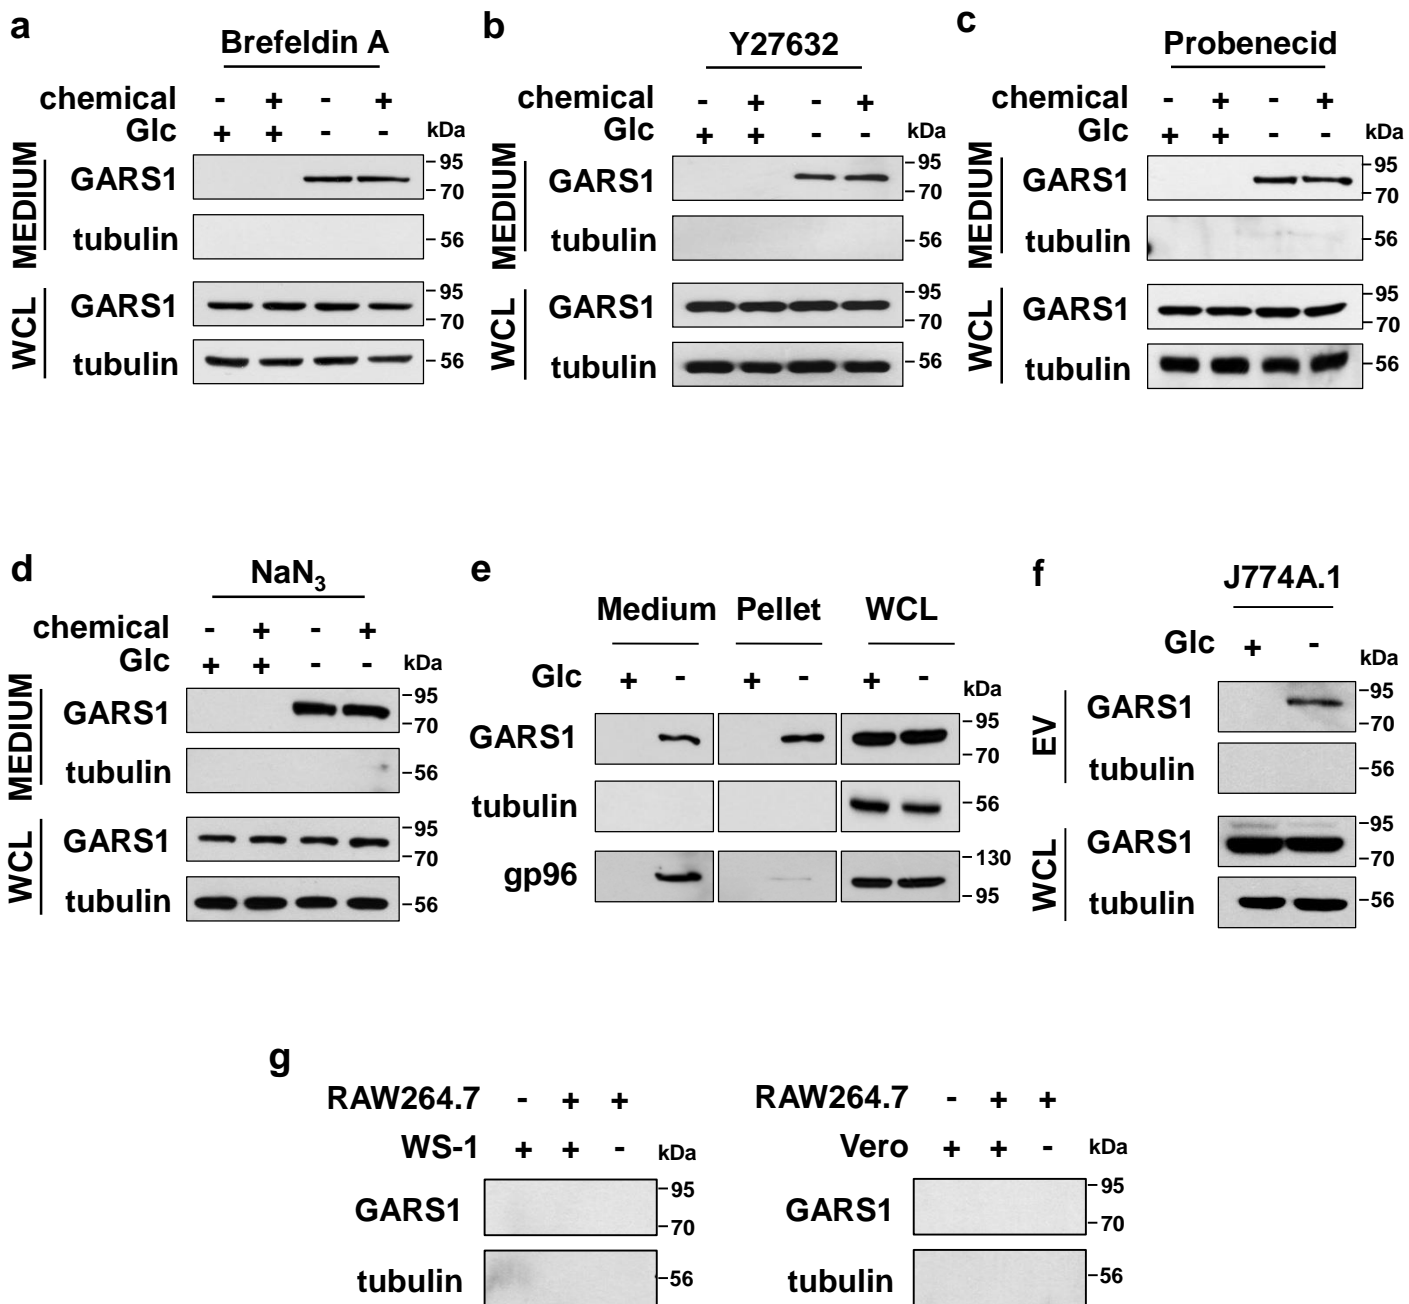

**a**

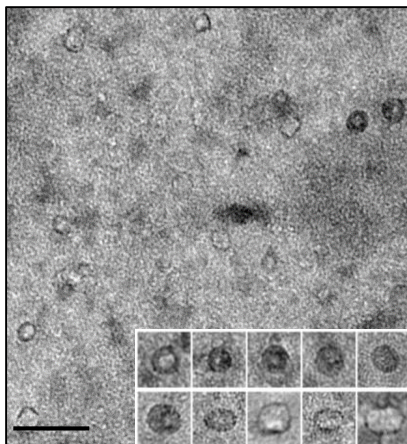

**b**

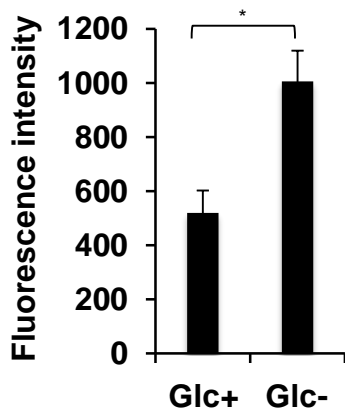

**c**

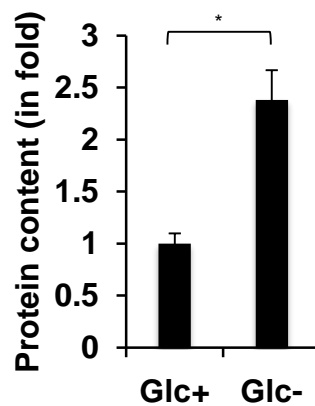

**d**

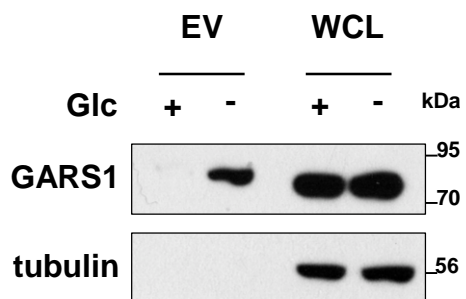

**e**

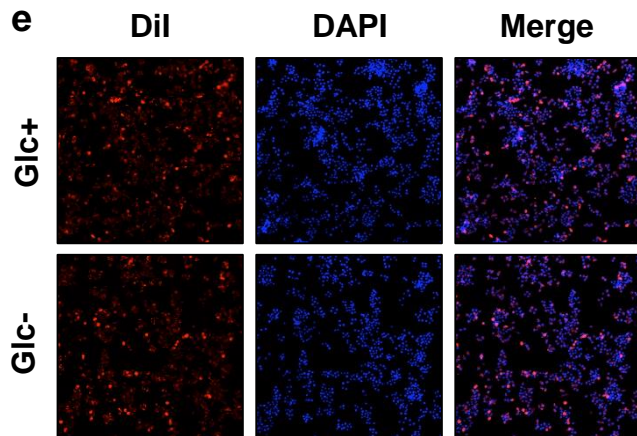

Figure S3

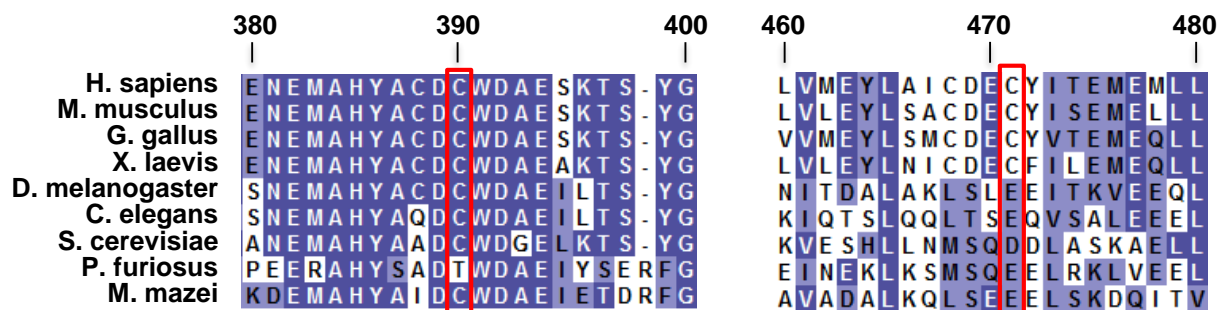

Figure S4

a

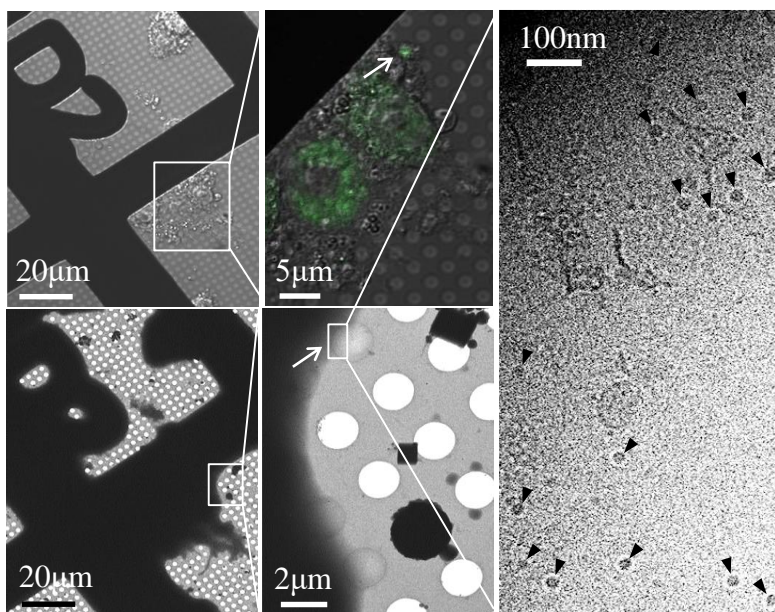

b

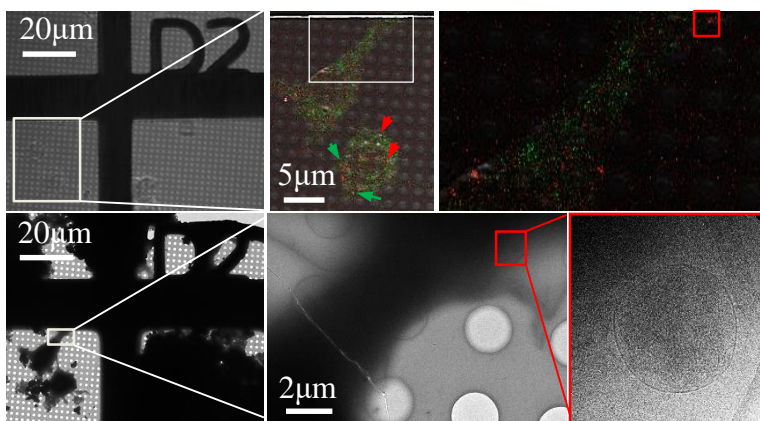

c

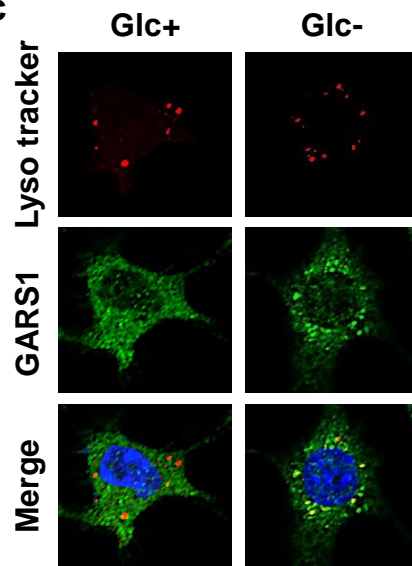

d

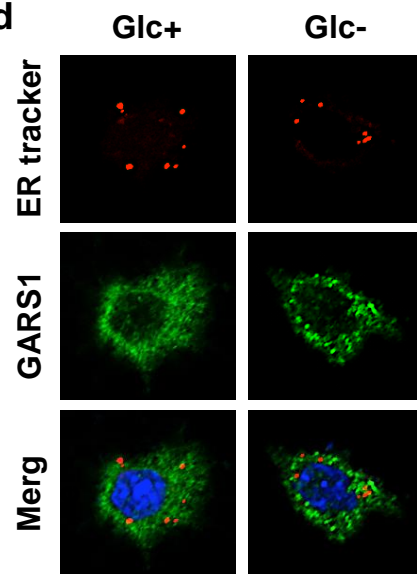

e

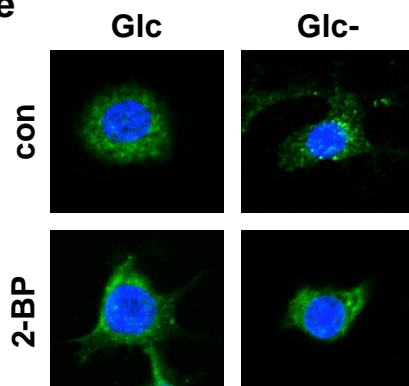

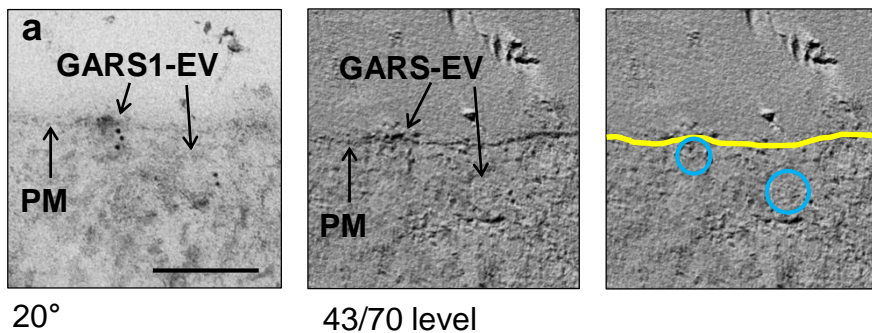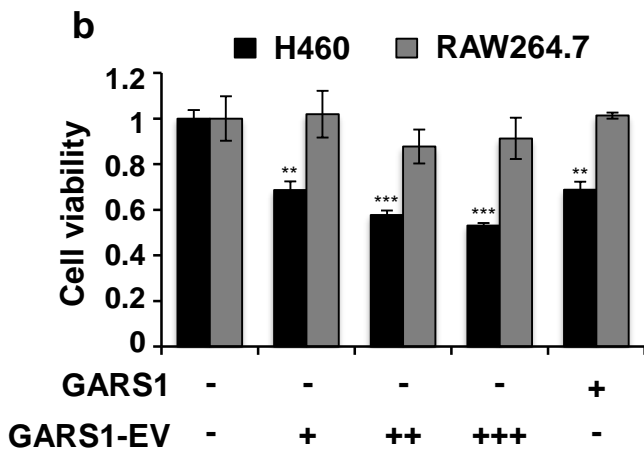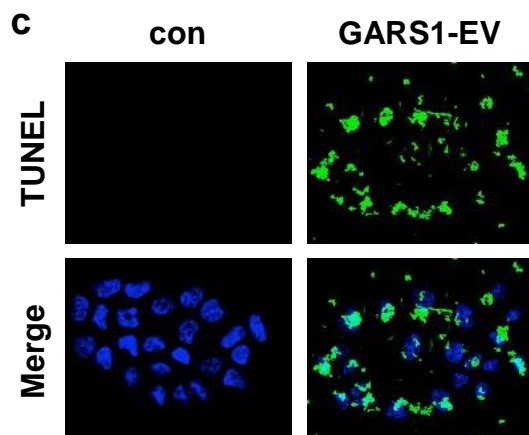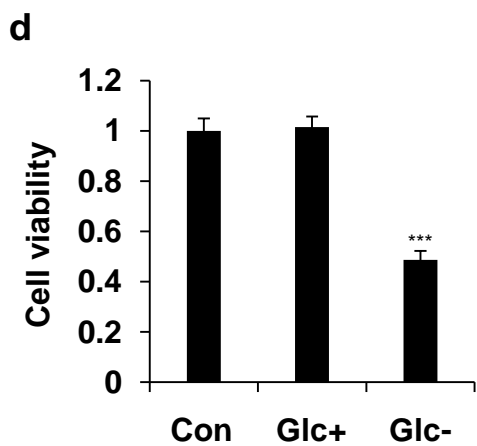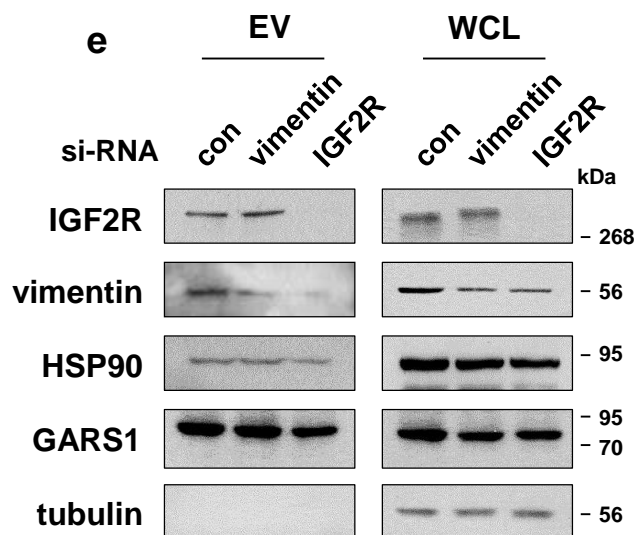

Supplement: JEV2-10-e12029-s001.pdf [file JEV2-10-e12029-s001.pdf]
